# Supplementary material
Source: PubMed Central journal article supplement (PMC6131136)
Supplement: 13280_2017_1008_MOESM1_ESM.pdf [file 13280_2017_1008_MOESM1_ESM.pdf]

**Ambio**

Electronic Supplementary Material

*This supplementary material has not been peer reviewed.*

Title: **The monkey is not always a God: Attitudinal differences toward crop-raiding macaques and why it matters for conflict mitigation**

Authors: Shaurabh Anand, Vilakkathala Vijayan Binoy, Sindhu Radhakrishna

Table S1: Number of households and percentage sampled in each village for Solan, HP

| S. No. | Village               | HH* | % Sampled |
|--------|-----------------------|-----|-----------|
| 1      | Amru                  | 25  | 36        |
| 2      | Baddi                 | 53  | 17        |
| 3      | Banti                 | 44  | 20        |
| 4      | Bara basot            | 123 | 7         |
| 5      | Baraghu               | 20  | 45        |
| 6      | Bargyana              | 27  | 33        |
| 7      | Bauh                  | 29  | 31        |
| 8      | Bawasi                | 42  | 21        |
| 9      | Bhalauri              | 20  | 45        |
| 10     | Bharol                | 23  | 39        |
| 11     | Bir pilasi            | 179 | 5         |
| 12     | Chalioni              | 10  | 90        |
| 13     | Chalog                | 13  | 69        |
| 14     | Chanaharri            | 12  | 75        |
| 15     | Chandi                | 107 | 8         |
| 16     | Dadal                 | 98  | 9         |
| 17     | Datiar Delhi          | 172 | 5         |
| 18     | Dattowa               | 369 | 2         |
| 19     | Dehun                 | 179 | 5         |
| 20     | Dhaela                | 26  | 35        |
| 21     | Dhauni                | 23  | 39        |
| 22     | Dhundand              | 110 | 8         |
| 23     | Didu                  | 46  | 20        |
| 24     | Digal                 | 93  | 10        |
| 25     | Durgapur              | 28  | 32        |
| 26     | Garkhal               | 316 | 3         |
| 27     | Ghariach              | 40  | 23        |
| 28     | Gharoti               | 106 | 8         |
| 29     | Handi kundi           | 34  | 26        |
| 30     | Jabli                 | 26  | 35        |
| 31     | Jaghana               | 39  | 23        |
| 32     | Jogon                 | 180 | 5         |
| 33     | Kaniara               | 51  | 18        |
| 34     | Kashambhowal Kanaitan | 24  | 38        |
| 35     | Katiara               | 14  | 64        |
| 36     | Kaundi                | 23  | 39        |
| 37     | Kawaran               | 17  | 53        |
| 38     | Khera                 | 30  | 30        |
| 39     | Kol                   | 15  | 60        |
| 40     | Kothon                | 63  | 14        |
| 41     | Kotla                 | 20  | 45        |

| S. No. | Village         | HH* | %Sampled |
|--------|-----------------|-----|----------|
| 42     | Lodi majra      | 139 | 6        |
| 43     | Mahadeo         | 25  | 36       |
| 44     | Maithal         | 48  | 19       |
| 45     | Mandi           | 19  | 47       |
| 46     | Maneshi         | 46  | 20       |
| 47     | Mangoti         | 81  | 11       |
| 48     | Manjhol         | 28  | 32       |
| 49     | Mansar          | 80  | 11       |
| 50     | Mastanpura      | 185 | 5        |
| 51     | Matuli          | 76  | 12       |
| 52     | Mittian         | 83  | 11       |
| 53     | Nahar singh     | 24  | 38       |
| 54     | Pannar          | 29  | 31       |
| 55     | Panu kathlan    | 22  | 41       |
| 56     | Patith          | 16  | 56       |
| 57     | Paundi          | 22  | 41       |
| 58     | Rajpur jakhauri | 118 | 8        |
| 59     | Ratho           | 20  | 45       |
| 60     | Ratwari         | 117 | 8        |
| 61     | Ratyor          | 352 | 3        |
| 62     | Rauri           | 11  | 82       |
| 63     | Salhar          | 38  | 24       |
| 64     | Sanana          | 17  | 53       |
| 65     | Sandhog         | 41  | 22       |
| 66     | Sanhech         | 25  | 36       |
| 67     | Sari            | 24  | 38       |
| 68     | Sarsa           | 16  | 56       |
| 69     | Sauri           | 55  | 16       |
| 70     | Seri            | 25  | 36       |
| 71     | Serta           | 20  | 45       |
| 72     | Shalogra        | 239 | 4        |
| 73     | Shil            | 16  | 56       |
| 74     | Siyarali        | 21  | 43       |
| 75     | Sohta           | 14  | 64       |
| 76     | Surajpur        | 54  | 17       |
| 77     | Talar basi      | 26  | 35       |
| 78     | Thach           | 35  | 26       |
| 79     | Tharola         | 33  | 27       |
| 80     | Timli           | 45  | 20       |
| 81     | Walam           | 52  | 17       |

\* Census of India (2011)

Census of India. 2011. Primary Census Abstract Data Tables - Himachal Pradesh.

Office of the Registrar General & Census Commissioner, India.

Table S2: Number of households and percentage sampled in each village for Kasargod, Kerala

| S. No | Village / sub-village | Census village | HH (Census village)# | HH sampled (village / sub-village) | HH sampled (Census village)# | % HH sampled |
|-------|-----------------------|----------------|----------------------|------------------------------------|------------------------------|--------------|
| 1     | Periyatt              | Balal          | 2415                 | 10                                 | 10                           | 0.41%        |
| 2     | Bheemanadi            | Bheemanadi     | 3625                 | 10                                 | 10                           | 0.28%        |
| 3     | Cheemeni              | Cheemeni       | 2029                 | 2                                  | 2                            | 0.10%        |
| 6     | Kambaloor             | Chithari       | 3308                 | 1                                  | 1                            | 0.03%        |
| 14    | Pullodi               | Kallar         | 4691                 | 16                                 | 16                           | 0.34%        |
| 4     | Edakkanam             | Maloth         | 3565                 | 20                                 | 153                          | 4.29%        |
| 5     | kadavathmunda         |                |                      | 20                                 |                              |              |
| 7     | Koolimada             |                |                      | 40                                 |                              |              |
| 10    | Padayamkallu          |                |                      | 4                                  |                              |              |
| 11    | pamathattu            |                |                      | 26                                 |                              |              |
| 15    | Punja                 |                |                      | 12                                 |                              |              |
| 16    | Valiyapaama           |                |                      | 1                                  |                              |              |
| 17    | Venkallu              |                |                      | 30                                 |                              |              |
| 1     | Athiyadukkam          | Palavayal      | 2293                 | 25                                 | 53                           | 2.31%        |
| 8     | Kottanchery           |                |                      | 13                                 |                              |              |
| 9     | Muttomkadavu          |                |                      | 15                                 |                              |              |
| 12    | Panathady             | Panathady      | 5563                 | 2                                  | 2                            | 0.04%        |

# Census of India (2011)

Census of India. 2011. Primary Census Abstract Data Tables - Kerala. Office of the Registrar General & Census Commissioner, India.
